# Supplementary material
Source: Copernicus journal article supplement (doi:10.5194/tc-20-2469-2026)
Supplement: Supplementary file 1 [file tc-20-2469-2026-supplement.pdf]

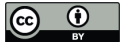

*Supplement of*

## **Impact of spatial resolution on large-scale ice cover modelling of mountainous regions**

**Helen Werner et al.**

*Correspondence to:* Helen Werner ([helen.werner@gfz.de](mailto:helen.werner@gfz.de))

The copyright of individual parts of the supplement might differ from the article licence.

## S1 Additional maps

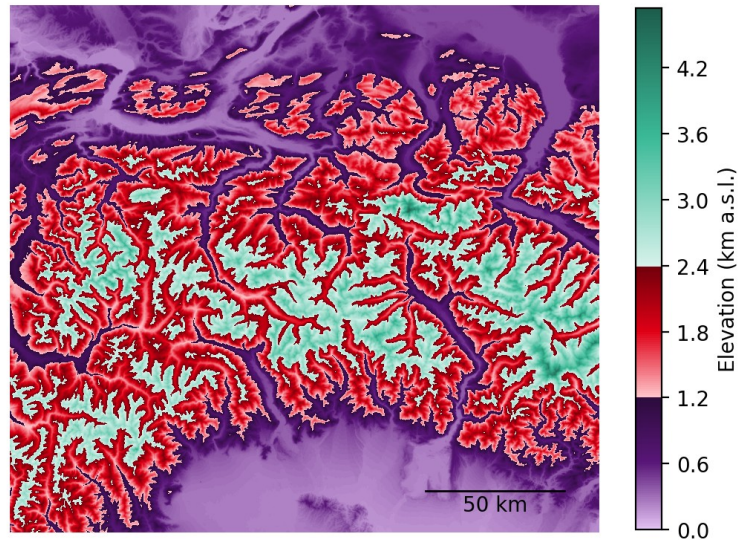

5 **Figure S1** Map of our model region showing our defined elevation bands for low (0–1200 m a.s.l., purple), mid (1200–2400 m a.s.l., red), and high altitudes (<2400 m a.s.l., green).

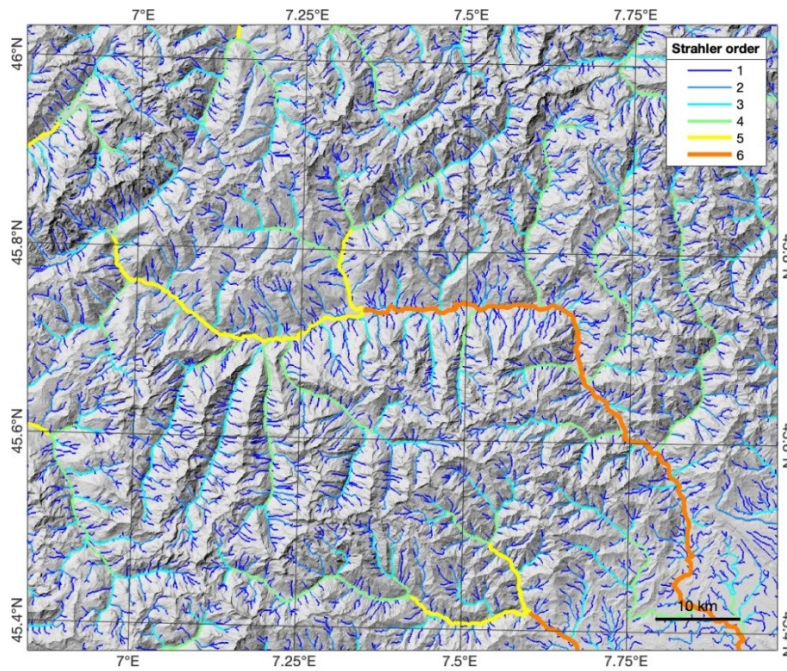

10 **Figure S2** Map of the Aosta Valley in Italy with colour-coded streams according to their Strahler stream order (Strahler, 1957). The Strahler order defines the stream size based on a hierarchy of tributary streams. Streams of order 1 (dark blue) are the smallest streams without any tributaries. As the stream order increases, the streams and associated valleys have more branches upstream and their sizes increase. The largest streams in this area are of Strahler order 6 (orange).

## S2 Ice field conditions at full glaciation

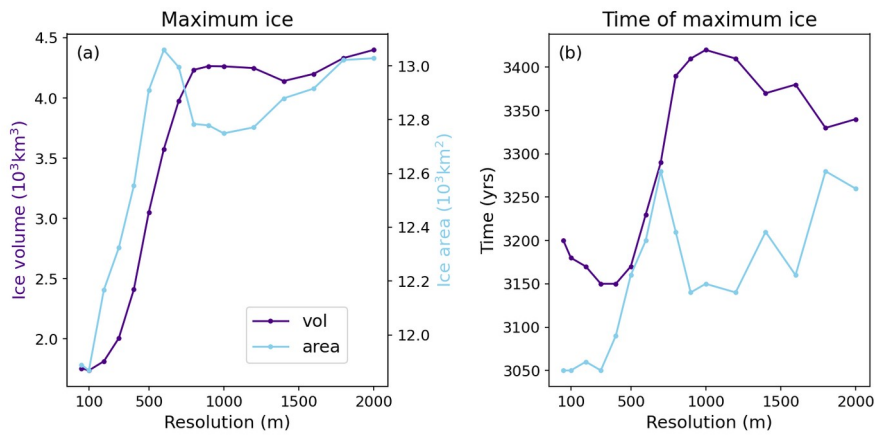

**Figure S3** (a) Maximum ice volume (purple) and area (blue), (b) time of maximum ice volume (purple) and area (blue) for simulations at all resolutions.

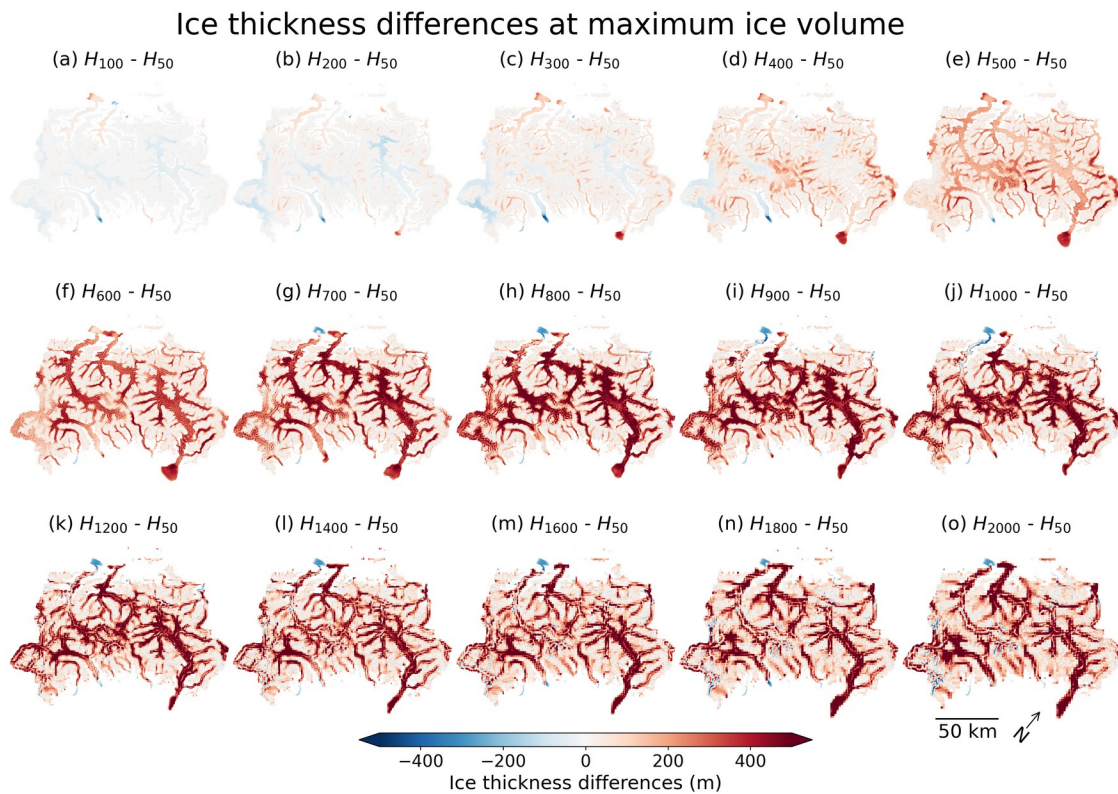

15

**Figure S5** Ice thickness differences  $\Delta H = H_r - H_{50}$  at maximum ice volume between models at resolution  $r$  and the 50 m reference run. This figure is an expanded version of Fig. 5 in the main text.

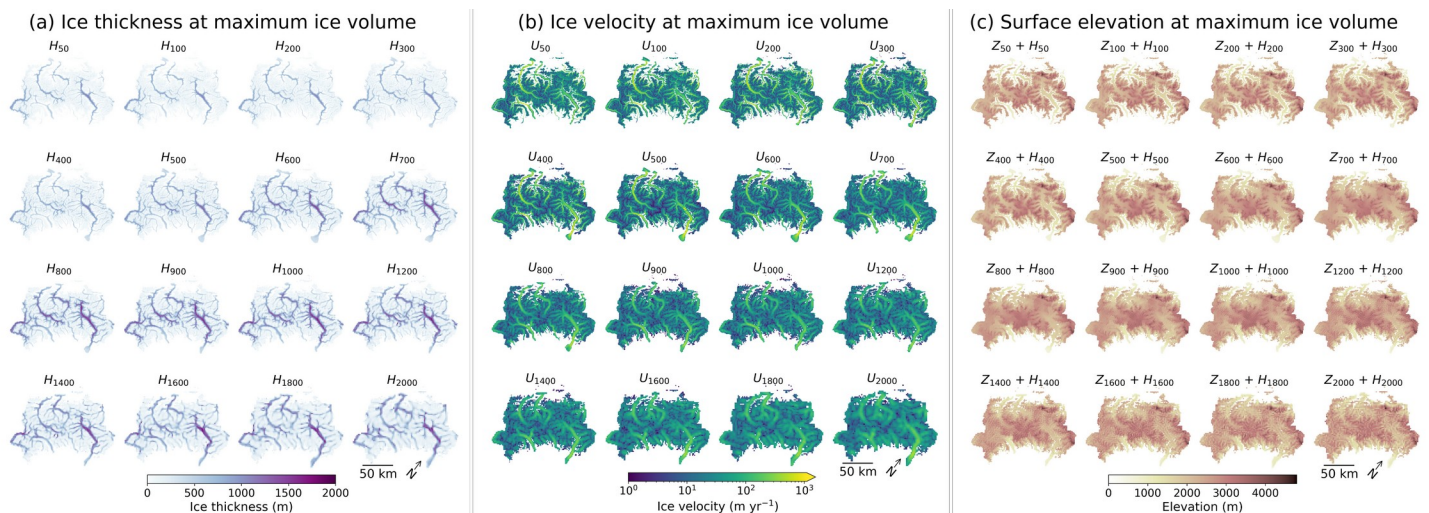

20 **Figure S4** (a) Ice thickness  $H_r$ , (b) depth-averaged ice velocity  $U_r$ , (c) surface elevation (bedrock elevation  $Z_r$  plus ice thickness  $H_r$ ) at maximum ice volume for simulations at resolution  $r$ .

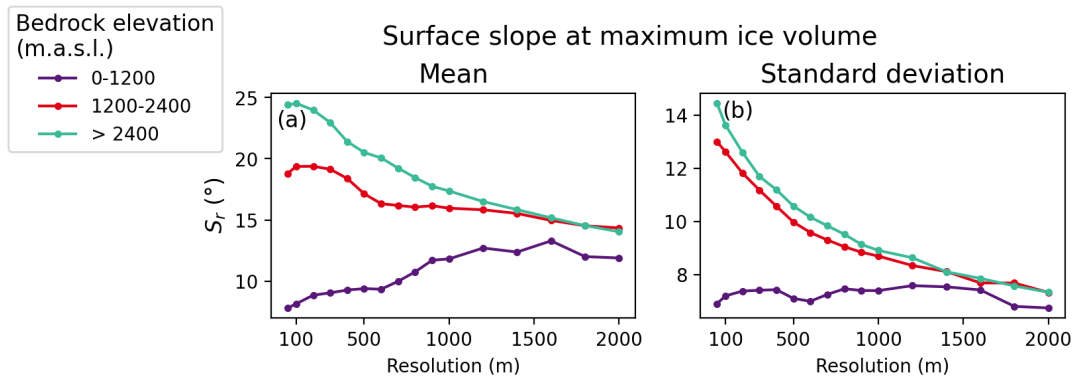

**Figure S6** (a) Mean and (b) standard deviation of slope angle of surface elevation (bedrock elevation and ice thickness) at full glaciation across the glaciated area at low (0–1200 m a.s.l.), mid (1200–2400 m a.s.l.), and high (>2400 m a.s.l.) altitudes.

25

### S3 Simulations using slower temperature forcing

The following figure shows model outputs from simulations using a fast temperature forcing with 4 °C temperature change per 1,000 years shown in Figs. 3-7 in the main text and slow temperature forcing with 2 °C temperature change per 1,000 years. In model years, the cooling phase spans 1000–3000 years under fast and 1000–5000 years under slow temperature forcing, and the warming phase spans 3000–5000 years under fast and 5000–9000 years under fast temperature forcing. For a more detailed description of the applied temperature forcings we refer to section 2.2 in the main text.

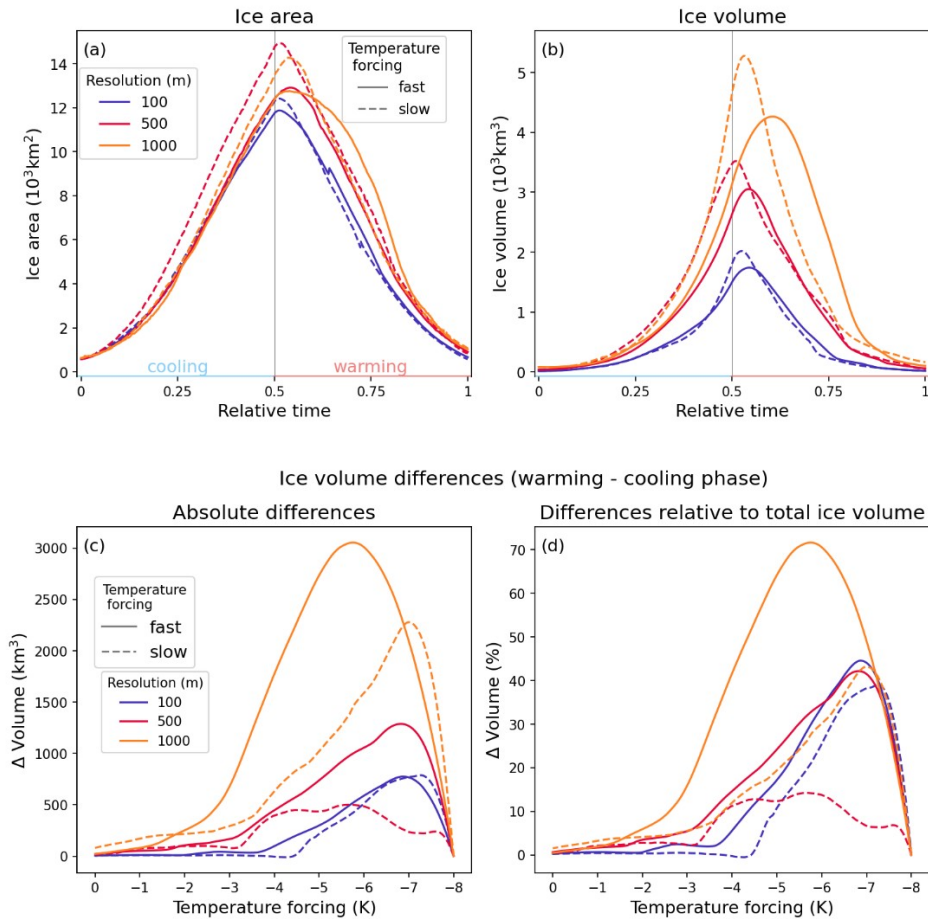

**Figure S7** Ice volume and area under fast (solid line) and slow (dashed line) temperature forcing at 100 (blue), 500 (red), and 1000 m (orange) resolution. (a) Ice area, (b) ice volume over relative time. Relative time on the x-axis ranges from 0 (start of cooling phase with a temperature forcing of 0 K) to 1 (end of cooling phase with a temperature forcing of 0 K). At 0.5, half of the simulation is reached, where temperature forcing is strongest at -8 K and the warming phase begins. (c) Absolute and (d) relative differences of ice volume at times with the same temperature forcing value during the warming and cooling phases (warming minus cooling phase). Panel (a) is similar to Fig. 3c, and differences in (d) are relative to the total ice volume.

#### 40 S4 Experiments with smoothed DEMs

The following two figure show input and outputs from additional experiments based on a smoothed topography. The smoothed topography is obtained through the following process: We took the DEM of our model domain at 2 km resolution, which was created from the fine resolution DEM using cubic resampling. Therefore, the 2 km DEM is rather smooth with less topographic detail. We then proceeded to interpolate the 2 km DEM back to finer resolutions, again using cubic convolution. The mean slope angle of the original DEM is 21.5°, and of the smoothed DEM is 11.5°.

45

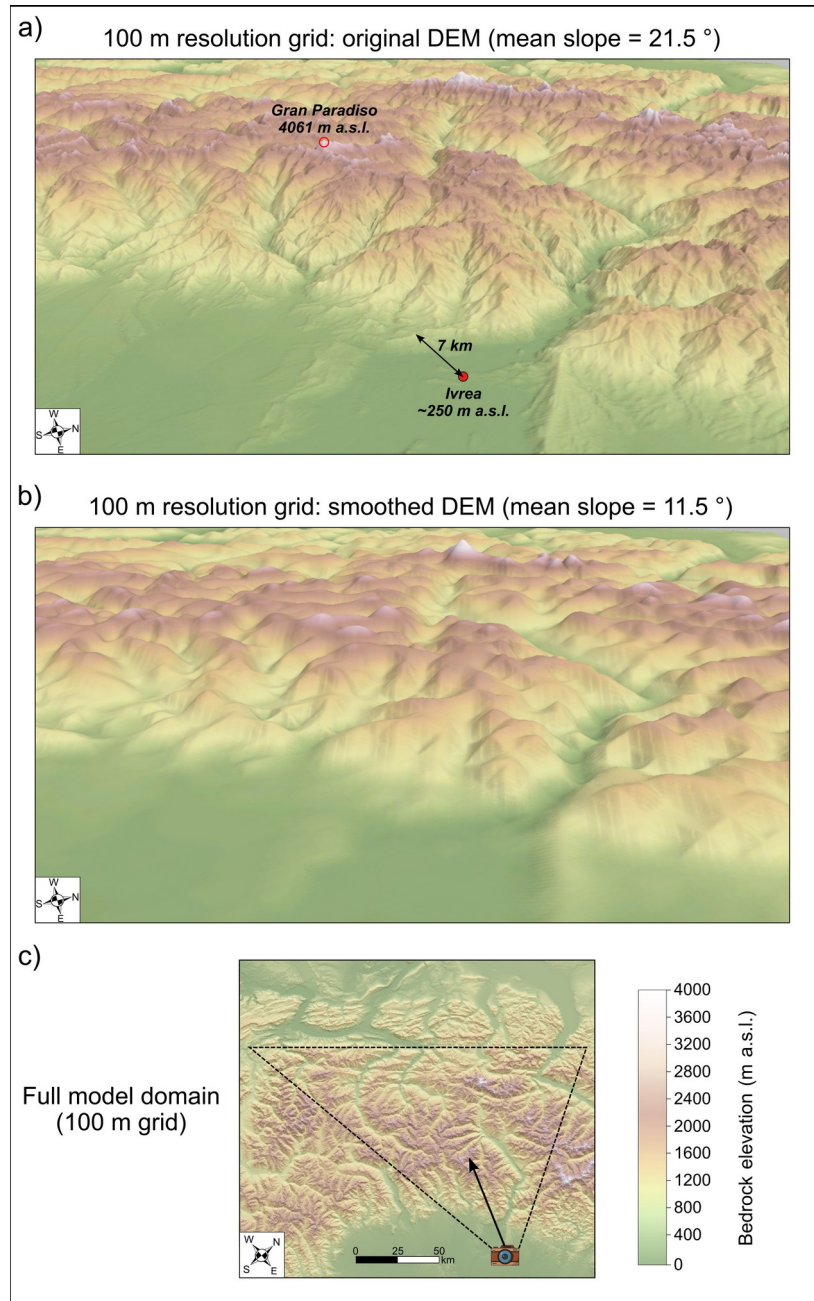

**Figure S8** Comparison of (a) original and (b) smoothed DEM, both at 100 m resolution. The smoothed DEM is based on the 2000-m DEM using cubic resampling at 100 m. The perspective of (a) and (b) inside the model domain (original 100-m DEM) is shown in (c). All panels were produced using ArcGIS Pro 3.2.2 (Esri).

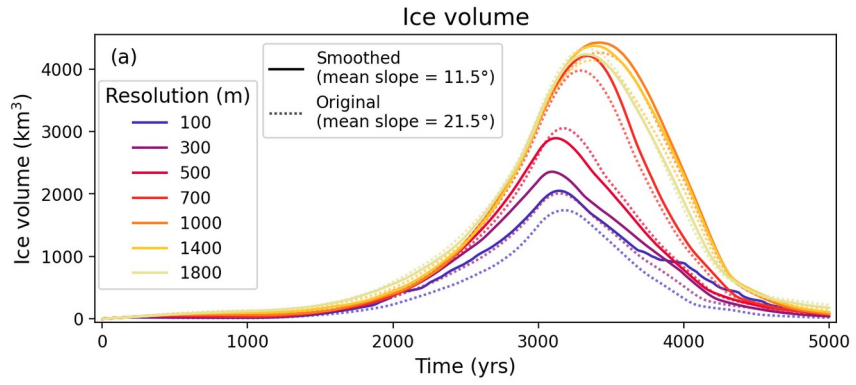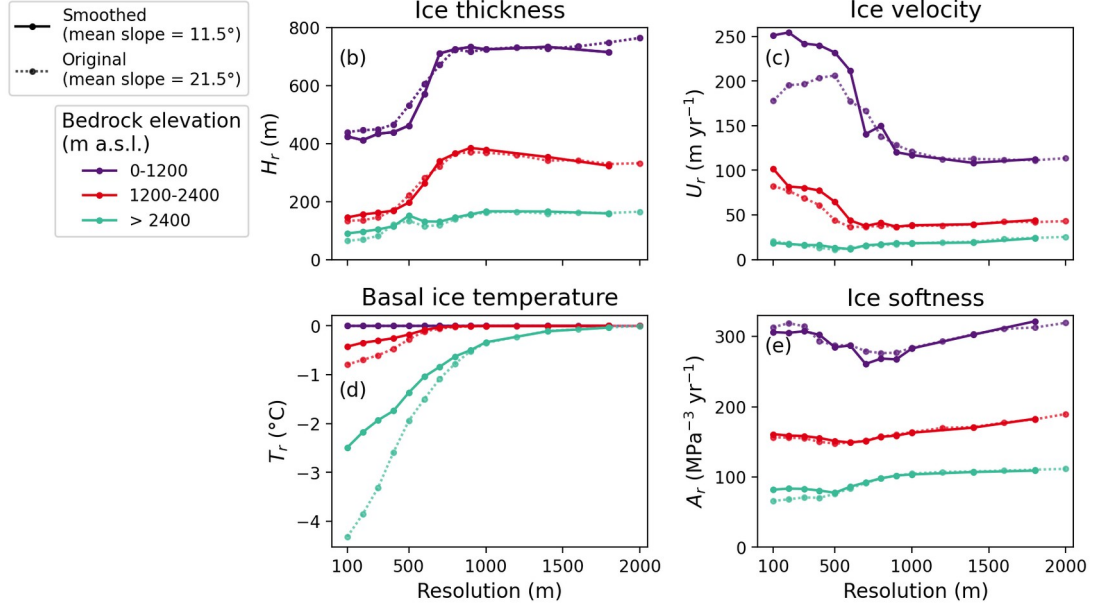

50

**Figure S9** Comparison of simulations based smoothed DEMs to simulations based on the original DEMs. (a) Temporal evolution of ice volume, at 100, 300, 500, 700, 1000, 1400, 1800 m resolutions. (b)–(e) Model output variables at full glaciation averaged over glaciated area at different resolutions  $r$ , distinguished between low (0–1200 m a.s.l.), mid (1200–2400 m a.s.l.), and high (>2400 m a.s.l.) bedrock altitudes (similar to Fig. 7 in the main text): (b) Ice thickness  $H_r$ , (c) depth-averaged ice velocity  $U_r$ , (d) basal ice temperature  $T_r$ , (e) depth-averaged Arrhenius factor  $A_r$ . In all subplots, solid lines correspond to results based on the smoothed DEMs, and dashed lines correspond to results based on original DEMs.

55

## S5 Model parameters and climate input

**Table S1** IGM model parameters that are based on Leger et al. 2025’s ensemble best-scoring simulation (simulation 37).

| IGM module / parameter name | Description                                                  | System component     | Value              | Unit                                               |
|-----------------------------|--------------------------------------------------------------|----------------------|--------------------|----------------------------------------------------|
| <b>Surface mass balance</b> |                                                              |                      |                    |                                                    |
| smb_accpdd_update_freq      | Frequency at which the Surface Mass Balance (SMB) is updated | Surface mass balance | 1.0                | yr                                                 |
| accpdd_refreeze_factor      | Positive Degree Day refreezing factor                        | Surface mass balance | 0.6156090086419556 | n/a                                                |
| smb_accpdd_thr_temp_snow    | Threshold temperature for solid precipitation                | Surface mass balance | 0.0                | °C                                                 |
| smb_accpdd_thr_temp_rain    | Threshold temperature for liquid precipitation               | Surface mass balance | 2.0                | °C                                                 |
| smb_accpdd_melt_factor_snow | Positive Degree Day melt rate for snow                       | Surface mass balance | 1.20409532638      | $\text{m we } ^\circ\text{C}^{-1} \text{ yr}^{-1}$ |
| smb_accpdd_melt_factor_ice  | Positive Degree Day melt rate for ice                        | Surface mass balance | 2.8262694332550296 | $\text{m we } ^\circ\text{C}^{-1} \text{ yr}^{-1}$ |
| smb_accpdd_shift_hydro_year | This serves to start Oct 1 the acc/melt computation          | Surface mass balance | 0.75               | yr                                                 |
| smb_accpdd_ice_density      | Density of ice for conversion of SMB into ice equivalent     | Surface mass balance | 910.0              | $\text{kg m}^{-3}$                                 |
| smb_accpdd_wat_density      | Density of water                                             | Surface mass balance | 1000.0             | $\text{kg m}^{-3}$                                 |
| <b>Ice flow</b>             |                                                              |                      |                    |                                                    |
| filo_enhancement_factor     | Flow law enhancement factor                                  | Ice flow             | 1.3885266806845515 | n/a                                                |

| IGM module / parameter name | Description                                                                          | System component | Value                                            | Unit                              |
|-----------------------------|--------------------------------------------------------------------------------------|------------------|--------------------------------------------------|-----------------------------------|
| iflo_regu_glen              | Regularisation parameter for Glen's flow law                                         | Ice flow         | 0.0                                              | n/a                               |
| iflo_regu_weertmann         | Regularisation parameter for Weertman's sliding law                                  | Basal sliding    | 10 <sup>-10</sup>                                | n/a                               |
| iflo_exp_glen               | Glen's flow law exponent                                                             | Ice flow         | 3.0                                              | n/a                               |
| iflo_exp_weertman           | Weertman's law exponent                                                              | Basal sliding    | 4.0                                              | n/a                               |
| iflo_gravity_cst            | Acceleration due to gravity of a free falling object                                 | Ice flow         | 9.81                                             | m s <sup>-2</sup>                 |
| iflo_ice_density            | Density of ice                                                                       | Ice flow         | 910.0                                            | kg m <sup>-3</sup>                |
| iflo_Nz                     | Number of grid points for the vertical discretisation                                | Ice flow         | 10.0                                             | n/a                               |
| iflo_vert_spacing           | Discretisation density to get more points towards glacier bed than surface           | Ice flow         | 4.0                                              | n/a                               |
| iflo_thr_ice_thk            | Threshold ice thickness for computing strain rate                                    | Ice flow         | 0.1                                              | m                                 |
| iflo_dim_arrhenius          | Dimension of the Arrhenius factor (horizontal 2D or 3D)                              | Ice flow         | 3.0                                              | n/a                               |
| iflo_retrain_emulator_freq  | Frequency at which the emulator is retrained, 0 means never, 1 means every time step | Neural network   | 2.0 (50, 100 m res.)*, 7.0 (else)                | time step                         |
| iflo_retrain_emulator_lr    | Learning rate for the retraining of the emulator                                     | Neural network   | 10 <sup>-5</sup>                                 | n/a                               |
| iflo_retrain_emulator_nbit  | Number of iterations at each time step for retraining the emulator                   | Neural network   | 1.0                                              | iterations                        |
| iflo_force_max_velbar       | Artificially upper-bound of ice velocities                                           | Ice flow         | 3000.0                                           | m yr <sup>-1</sup>                |
| iflo_network                | Type of network, it can be cnn or unet                                               | Neural network   | "cnn"                                            | n/a                               |
| iflo_nb_layers              | Number of layers in the Convolutional Neural Network (CNN)                           | Neural network   | 16.0                                             | n/a                               |
| iflo_nb_blocks              | Number of block layer in the U-net                                                   | Neural network   | 4                                                | n/a                               |
| iflo_nb_out_filter          | Number of output filters in the CNN                                                  | Neural network   | 32.0                                             | n/a                               |
| iflo_conv_ker_size          | Size of the convolution kernel                                                       | Neural network   | 3.0                                              | n/a                               |
| iflo_dropout_rate           | Dropout rate in the CNN                                                              | Neural network   | 0                                                | n/a                               |
| iflo_min_sr                 | Minimum strain rate                                                                  | Ice flow         | 10 <sup>-5</sup>                                 | yr <sup>-1</sup>                  |
| iflo_max_sr                 | Maximum strain rate                                                                  | Ice flow         | 1.0                                              | yr <sup>-1</sup>                  |
| thk_slope_type              | Slope limiter for the ice thickness equation (godunov or superbee)                   | Ice flow         | "superbee"                                       | n/a                               |
| vflo_method                 | Method to retrieve vertical velocities (kinematic, incompressibility)                | Ice flow         | "incompressibility"                              | n/a                               |
| <b>Time</b>                 |                                                                                      |                  |                                                  |                                   |
| time_start                  | Simulation start                                                                     | Time             | 0.0                                              | yr                                |
| time_end                    | Simulation end                                                                       | Time             | 5000.0<br>(9000.0 with slow temperature forcing) | yr                                |
| time_save                   | Save output frequency                                                                | Time             | 10.0                                             | yr                                |
| time_cfl                    | CFL number for the stability of the mass conservation scheme                         | Time             | 0.3                                              |                                   |
| time_stp_max                | Maximum time step allowed, used only with slow ice                                   | Time             | 10.0                                             | yr                                |
| <b>Enthalpy</b>             |                                                                                      |                  |                                                  |                                   |
| enth_water_density          | Density of water                                                                     | Enthalpy         | 1000.0                                           | kg m <sup>-3</sup>                |
| enth_spy                    | Number of seconds in a year                                                          | Enthalpy         | 31556926.0                                       | seconds                           |
| enth_ki                     | Conductivity of cold ice                                                             | Enthalpy         | 2.1                                              | W m <sup>-1</sup> K <sup>-1</sup> |

| IGM module / parameter name      | Description                                                   | System component             | Value              | Unit                                 |
|----------------------------------|---------------------------------------------------------------|------------------------------|--------------------|--------------------------------------|
| ent_ci                           | Specific heat capacity of ice                                 | Enthalpy                     | 2009.0             | W s kg <sup>-1</sup> K <sup>-1</sup> |
| enth_Lh                          | Latent heat of fusion                                         | Enthalpy                     | 334000.0           | W s kg <sup>-1</sup>                 |
| ent_KtdivKc                      | Ratio of temperate versus cold ice diffusivity                | Enthalpy                     | 0.1                | n/a                                  |
| enth_claus_clape                 | Clausius-Clapeyron constant                                   | Enthalpy                     | $7.9 \times 10^8$  | K Pa <sup>-1</sup>                   |
| enth_melt_temp                   | Melting point at standard pressure                            | Enthalpy                     | 273.15             | K                                    |
| enth_ref_temp                    | Reference temperature                                         | Enthalpy                     | 223.15             | K                                    |
| enth_till_friction_angle_bed_min | Lower bed elevation threshold for yield stress                | Yield stress                 | -444.8608285471192 | m a.s.l.                             |
| enth_till_friction_angle_bed_max | Upper bed elevation threshold for yield stress                | Yield stress                 | 2982.864772500515  | m a.s.l.                             |
| ent_till_friction_angle_phi_min  | Minimum till friction angle in bed-elevation dependent scheme | Yield stress                 | 15.0               | °                                    |
| enth_till_friction_angle_phi_max | Maximum till friction angle in bed-elevation dependent scheme | Yield stress                 | 50.0               | °                                    |
| enth_uthreshold                  | Pseudo-plastic sliding law U threshold                        | Sliding                      | 1244.8467164648443 | m yr <sup>-1</sup>                   |
| enth_drain_rate                  | Water draining rate                                           | Yield stress                 | 0.001              | mm yr <sup>-1</sup>                  |
| enth_till_wat_max                | Maximum water till thickness                                  | Yield stress                 | 2.0                | m                                    |
| enth_default_bheatflx            | Geothermal heat flux                                          | Basal melt                   | 0.065              | W m <sup>-2</sup>                    |
| temperature_offset_air_to_ice    | Surface air-to-ice temperature offset                         | Enthalpy                     | 2.9022389684294243 | °C                                   |
| enth_tauc_min                    | Lower capping bound for yield stress                          | Yield stress                 | 10000.0            | Pa                                   |
| enth_tauc_max                    | Upper capping bound for yield stress                          | Yield stress                 | 1 0000000000.0     | Pa                                   |
| <b>Avalanche</b>                 |                                                               |                              |                    |                                      |
| avalanche_update_freq            | Update frequency of the avalanche module                      | Avalanche                    | 5.0                | yr                                   |
| avalanche_angleOfRepose          | Angle of repose. For bed slopes above this, ice “avalanches”  | Avalanche                    | 45.0               | °                                    |
| <b>Gflex</b>                     |                                                               |                              |                    |                                      |
| gflex_update_freq                | Update frequency of the gFlex GIA module                      | Glacial isostatic adjustment | 50.0               | yr                                   |
| gflex_default_Te                 | Lithospheric effective elastic thickness                      | Glacial isostatic adjustment | 45556.89245060796  | m                                    |
| gflex_dx                         | Spatial grid resolution of the gFlex GIA module               | Glacial isostatic adjustment | 2000.0             | m                                    |

\* The retraining frequency is 7.0 for simulations at resolutions of 200 m and coarser (as in Leger et al., 2025), and 2.0 for the highest-resolution simulations at 50 and 100 m resolution.

60 **Table S2** Initial monthly temperature and precipitation (similar to present-day). The data is derived from climate data averaged over 1981–2010 from a weather station in Modane, France, located at 1228 m a.s.l. within the model domain (Météo France, 2022), precipitation values were uniformly multiplied by 1.6. Throughout the model runs, temperature values were modified by the temperature forcing.

| Month     | Temperature (°C) | Precipitation (kg m <sup>-2</sup> yr <sup>-1</sup> we) |
|-----------|------------------|--------------------------------------------------------|
| January   | -1.4             | 1040.610                                               |
| February  | -0.4             | 1150.180                                               |
| March     | 3.3              | 876.608                                                |
| April     | 6.4              | 974.000                                                |
| May       | 11.4             | 1065.120                                               |
| June      | 14.4             | 1129.840                                               |
| July      | 16.9             | 788.000                                                |
| August    | 16.6             | 1046.270                                               |
| September | 12.8             | 1040.240                                               |
| October   | 8.7              | 1246.100                                               |
| November  | 2.2              | 1217.500                                               |
| December  | -0.8             | 1074.540                                               |
